# Supplementary material for: Periostin promotes tumor angiogenesis in pancreatic cancer via Erk/VEGF signaling
Source: PubMed Central journal article supplement (PMC5129999; doi:10.18632/oncotarget.9512), 2016-05-20
Supplement: oncotarget-07-40148-s001.pdf [file oncotarget-07-40148-s001.pdf]

## Periostin promotes tumor angiogenesis in pancreatic cancer via Erk/VEGF signaling

### SUPPLEMENTARY FIGURES

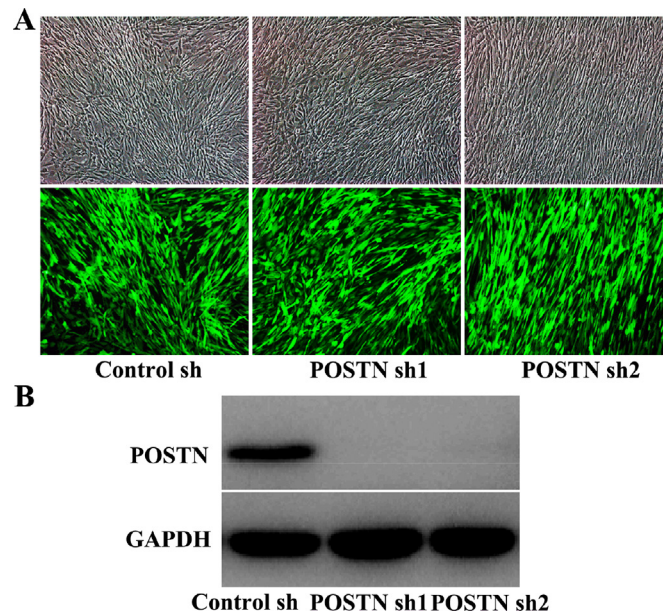

**Supplementary Figure S1: Validation of lentiviral transfection efficiency for Control sh, POSTN sh1 and POSTN sh2 in pancreatic stellate cells (PSCs).** **A.** PSCs were infected with lentiviral supernatant for 48 h and selected with 1  $\mu\text{g}/\text{mL}$  puromycin to generate stable transfected cells. Positive cells expressing GFP fusion protein were photographed under fluorescence microscopy. **B.** POSTN expression levels in PSCs stably transfected with Control sh, POSTN sh1, or POSTN sh2 were confirmed by western blot analysis. GAPDH was used for normalization.

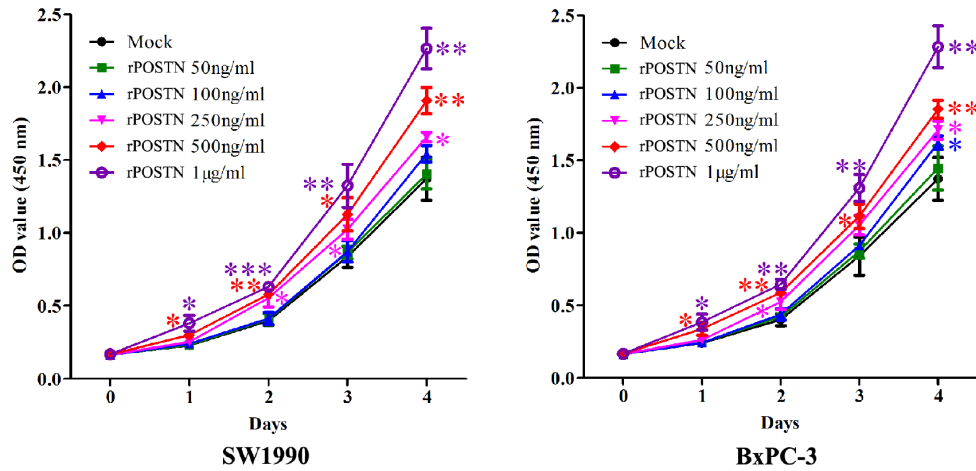

**Supplementary Figure S2: Proliferation of SW1990 and BxPC-3 cells incubated with different concentrations of rPOSTN.** Proliferation was measured by the CCK-8 assay. The proliferation rate of pancreatic cancer cells was highest with an rPOSTN concentration of 1 µg/mL and 500 ng/mL.
